# Supplementary material
Source: publisher figshare collection journal article supplement (https://sage.figshare.com/ndownloader/files/21110025)
Supplement: Supplementary file 1 [file 21110025]

# Voting Behavior under Proportional Representation

## Supplemental Appendix

Peter Buisseret\* Carlo Prato†

### Bounds on vote shares

Let  $v_A(\Delta, \xi)$  be defined as the vote share of party  $A$  as a function of the payoff difference  $\Delta$  and the aggregate shock  $\xi$ :

$$v_A(\Delta, \xi) = \frac{1}{2} + \phi(\Delta - \xi),$$

where we recall  $\Delta(l_A, l_B) \equiv V_A(l_A, l_B) - V_B(l_A, l_B)$ . We assume that the density of the idiosyncratic shock is small enough so that  $v_A(\Delta, \xi)$  is always interior:  $v_A(\Delta, \xi) \in (0, 1)$  for all  $(\Delta, \xi) \in [-1, 1] \times \left[-\frac{1}{2\psi}, \frac{1}{2\psi}\right]$ . In addition, we assume that both parties have always a chance of securing two seats, which is equivalent to imposing that  $[1 - \pi^*, \pi^*] \subset \text{supp}(v_A(\Delta, \xi))$  for all  $\Delta \in [-1, 1]$ .

Recall that  $\tilde{\pi} \equiv \phi^{-1}(\pi^* - .5)$ . After rearranging, these two assumptions are equivalent to imposing

**Assumption 1.**  $\phi$  and  $\tilde{\pi}$  are such that

$$\begin{aligned}\frac{1}{2\phi} &\geq \frac{1}{2\psi} + 1 \\ \tilde{\pi} &\leq \frac{1}{2\psi} - 1\end{aligned}$$

Notice that this assumption implies that  $2\psi > 1$ .

---

\*Harris School of Public Policy, University of Chicago, Email: [pbuisseret@uchicago.edu](mailto:pbuisseret@uchicago.edu)

†Department of Political Science, Columbia University, Email: [cp2928@columbia.edu](mailto:cp2928@columbia.edu)

## Proof of Proposition 1

For any voter, the probability of being decisive for the assignment of party  $A$ 's first seat, conditional on being pivotal, and given other voters' computed  $\Delta(l_A, l_B) \equiv V_A(l_A, l_B) - V_B(l_A, l_B)$  is given by Equation 15. Substituting (13) into (15), we obtain that  $\Delta(l_A, l_B)$  must be a root of the mapping  $\mathcal{V} : [-1, 1] \rightarrow [-1, 1]$ , where

$$\mathcal{V}(\Delta) \equiv \frac{l_A(2) - l_B(1)}{2} + \frac{l_A(1) + l_B(1) - l_A(2) - l_B(2)}{2} \frac{\psi(1 - \theta) + \theta \tilde{f}(\Delta + \tilde{\pi})}{2\psi(1 - \theta) + \theta \tilde{f}(\Delta + \tilde{\pi}) + \theta \tilde{f}(\Delta - \tilde{\pi})} - \Delta.$$

We argue that when  $\theta$  is small enough, this mapping has a unique root. To see this, notice that we have four possible cases:

I:  $l_A(1) = l_B(1) = 2$ , in which case

$$\mathcal{V}(\Delta) = \mathcal{V}_I(\Delta) \equiv -\frac{1}{2} + \frac{\psi(1 - \theta) + \theta \tilde{f}(\Delta + \tilde{\pi})}{2\psi(1 - \theta) + \theta \tilde{f}(\Delta + \tilde{\pi}) + \theta \tilde{f}(\Delta - \tilde{\pi})} - \Delta.$$

II:  $l_A(1) = l_B(1) = 1$ , in which case

$$\mathcal{V}(\Delta) = \mathcal{V}_{II}(\Delta) \equiv \frac{1}{2} - \frac{\psi(1 - \theta) + \theta \tilde{f}(\Delta + \tilde{\pi})}{2\psi(1 - \theta) + \theta \tilde{f}(\Delta + \tilde{\pi}) + \theta \tilde{f}(\Delta - \tilde{\pi})} - \Delta.$$

III:  $l_A(1) = l_B(2) = 2$ , in which case  $\mathcal{V}(\Delta) = -\Delta$ , which implies  $\Delta(l_A, l_B) = 0$ .

IV:  $l_A(2) = l_B(1) = 2$ , in which case  $\mathcal{V}(\Delta) = -\Delta$ , which implies  $\Delta(l_A, l_B) = 0$ .

It is immediate that in cases III and IV there is a unique root. Let's consider case I (case II is analogous). We have that

$$\frac{d\mathcal{V}}{d\Delta} = \theta \frac{(1 - \theta)\psi[\tilde{f}'(\Delta + \tilde{\pi}) - \tilde{f}'(\Delta - \tilde{\pi})] + \theta[\tilde{f}'(\Delta + \tilde{\pi})\tilde{f}(\Delta - \tilde{\pi}) - \tilde{f}'(\Delta - \tilde{\pi})\tilde{f}(\Delta + \tilde{\pi})]}{\left[2\psi(1 - \theta) + \theta \tilde{f}(\Delta + \tilde{\pi}) + \theta \tilde{f}(\Delta - \tilde{\pi})\right]^2}.$$

Since  $\tilde{f}'$  is finite,  $\lim_{\theta \rightarrow 0} \frac{d\mathcal{V}}{d\Delta} = 0$ , there exists  $\theta^* \in (0, 1]$  such that  $\forall \theta \leq \theta^*, \frac{d\mathcal{V}}{d\Delta} < 1$ .

Finally, we show that  $\tau^{CL}(\Delta(l_A, l_B)) > \frac{1}{2}$ , where

$$\tau^{CL}(\Delta) = \frac{\psi(1 - \theta) + \theta \tilde{f}(\Delta + \tilde{\pi})}{2\psi(1 - \theta) + \theta \tilde{f}(\Delta + \tilde{\pi}) + \theta \tilde{f}(\Delta - \tilde{\pi})}.$$

Suppose, to the contrary,  $\tau^{CL} \leq \frac{1}{2}$ . Then we must have  $\tilde{f}(\tilde{\pi} + \Delta) \leq \tilde{f}(-\tilde{\pi} + \Delta)$ . Since  $\tilde{f}$  is single peaked and symmetrically distributed around  $\bar{\xi} > 0$ , it must be that  $\Delta(l_A, l_B) \geq \bar{\xi}$ .

First, notice that under cases III and IV, we obtain  $\Delta(l_A, l_B) = 0 < \bar{\xi}$ , a contradiction.

Second, consider case I. In this case,  $\Delta(l_A, l_B)$  is the unique root of  $\mathcal{V}_I = \tau^{CL}(\Delta) - \frac{1}{2} - \Delta$ . Since we must have  $\tau^{CL}(\Delta) - \frac{1}{2} \leq 0$ , we obtain  $\Delta \leq 0 < \bar{\xi}$ , a contradiction.

Finally, consider case II. In this case,  $\Delta(l_A, l_B)$  is the unique root of  $\mathcal{V}_{II} = \frac{1}{2} - \tau^{CL}(\Delta) - \Delta$ . Notice that  $\mathcal{V}_{II}(\Delta)$  is continuous. Moreover, we have  $\mathcal{V}_{II}(-1) = \frac{3}{2} - \tau^{CL}(-1) > \frac{1}{2} > 0$  and  $\mathcal{V}_{II}(0) = \frac{1}{2} - \tau^{CL}(0) < 0$ —by symmetry of  $\tilde{f}$  and  $\bar{\xi} > 0$ . By the intermediate value theorem, it must be that the unique root of  $\mathcal{V}_{II}$  is in  $(-1, 0)$ , which again contradicts that  $\Delta(l_A, l_B) \geq \bar{\xi} > 0$ . This completes the proof.  $\square$

## Proof of Observation 2

Applying the implicit function theorem to  $\mathcal{V} = 0$ , we obtain

$$\frac{\partial \Delta(l_A, l_B)}{\partial l_A(1)} \bigg/ \frac{\partial(-\Delta(l_A, l_B))}{\partial l_B(1)} = -\frac{\frac{\partial \mathcal{V}}{\partial l_A(1)}}{\frac{\partial \mathcal{V}}{\partial \Delta}} \bigg/ -\frac{\frac{\partial \mathcal{V}}{\partial l_B(1)}}{\frac{\partial \mathcal{V}}{\partial(-\Delta)}} = \frac{\partial \mathcal{V}}{\partial l_A(1)} \bigg/ \frac{\partial(-\mathcal{V})}{\partial l_B(1)} = \frac{\tau^{CL}}{1 - \tau^{CL}} > 1.$$

## A Model of Open List PR

To model open list PR in the simplest possible way, we assume that each party has a mass  $\lambda$  of *loyal voters* who cast a ballot for the *lower-appeal* candidate within their party with probability one. The rest of the electorate (share  $1 - 2\lambda$ ) is made up by independent voters, whose behavior and preferences over candidate appeal is the same as the voters in our baseline model: we denote by  $V_J$  the value of voting for one's preferred candidate from party  $J$ . An independent voter  $i$  votes for party  $B$  iff

$$V_B + \xi + \sigma_i \geq V_A.$$

Independent voters' *within party* preferences are entirely driven by appeal: with probability one, they vote for the higher-appeal candidate.

These assumptions require a more precise restatement of the notion of appeal  $q$  as a candidate's general ability to advance *local issues*; this is consistent with the idea that some politicians specialize in pursuing a party's programmatic policy goals, while others are more appealing owing to broader *personal vote-earning attributes* Åsa von Schoultz and Shugart (2018). As a result, we can interpret loyalists as programmatic-oriented voters and independents as less programmatic-oriented voters.

Let  $v_A$  the total vote share of party  $A$ . We have that

$$v_A = \lambda + (1 - 2\lambda) \left( \frac{1}{2} + \phi(V_A - V_B - \xi) \right)$$

We also assume that when independent voters equally divide their vote across parties, both high-quality candidates get elected: for all  $\Delta \in [-1, 1]$

$$\lambda < (1 - 2\lambda) \left( \frac{1}{2} + \phi\Delta \right).$$

This assumption also implies that when a party wins both seats, the high-appeal candidates must obtain more preference votes (i.e.  $\lambda < 1/4$ ). We also assume that  $\lambda$  is large enough so that loyal voters *can* determine the intra-party allocation of seats: for all  $\Delta \in [-1, 1]$

$$\lambda > (1 - 2\lambda) \left( \frac{1}{2} + \phi\Delta - \frac{\phi}{2\psi} \right).$$

As before, there are two realizations of the aggregate shock  $\xi_1^{OL}$  and  $\xi_2^{OL}$  where a voter's vote is pivotal for the allocation of party  $A$ 's first and second seat. However, there are two additional thresholds  $\xi_A^{OL}$  and  $\xi_B^{OL}$  so that when  $\xi = \xi_J^{OL}$ , a voter is pivotal for allocation of the seat between the higher-appeal candidate ( $q = 2$ ) and the lower-appeal candidate ( $q = 1$ ).

Under the assumptions, we have that  $\xi_2^{OL} < \xi_B^{OL} < \xi_A^{OL} < \xi_1^{OL}$ . As before, we assume that an independent voter's payoff is the average appeal among elected representatives, and that a high-appeal politician yields a payoff of 2 while a low-appeal politicians yields a payoff of 1.

We now proceed to derive the values  $V_A(l_A, l_B)$  and  $V_B(l_A, l_B)$ . Let  $\Pr(\text{pivot}) = \Pr(\xi \in \{\xi_2^{OL}, \xi_B^{OL}, \xi_A^{OL}, \xi_1^{OL}\})$

$$V_A = \frac{\Pr(\xi = \xi_2^{OL})}{\Pr(\text{pivot})} \frac{3}{2} + \frac{\Pr(\xi = \xi_B^{OL})}{\Pr(\text{pivot})} \frac{3}{2} + \frac{\Pr(\xi = \xi_A^{OL})}{\Pr(\text{pivot})} \frac{4}{2} + \frac{\Pr(\xi = \xi_1^{OL})}{\Pr(\text{pivot})} \frac{3}{2}.$$

*In words:* voting for  $A$  affects the quality of representation only when (i) party  $B$  gets more votes than  $A$ , but (ii) enough independent preference votes are cast so that voting for the high-appeal candidate of party  $A$  is decisive for the outcome of the intra-party contest for the single seat obtained by party  $A$ .

Similarly, we have

$$V_B = \frac{\Pr(\xi = \xi_2^{OL})}{\Pr(pivot)} \frac{3}{2} + \frac{\Pr(\xi = \xi_B^{OL})}{\Pr(pivot)} \frac{4}{2} + \frac{\Pr(\xi = \xi_A^{OL})}{\Pr(pivot)} \frac{3}{2} + \frac{\Pr(\xi = \xi_1^{OL})}{\Pr(pivot)} \frac{3}{2}.$$

We then obtain

$$\begin{aligned} \Delta \equiv V_A - V_B &= - \frac{\Pr(\xi = \xi_B^{OL})}{\Pr(pivot)} \frac{1}{2} + \frac{\Pr(\xi = \xi_A^{OL})}{\Pr(pivot)} \frac{1}{2} \\ &= \frac{\theta \tilde{f}(\Delta + \tilde{\lambda}) - \theta \tilde{f}(\Delta - \tilde{\lambda})}{4\psi(1 - \theta) + \theta[\tilde{f}(\Delta - \tilde{\pi}) + \tilde{f}(\Delta - \tilde{\lambda}) + \tilde{f}(\Delta + \tilde{\lambda})\tilde{f}(\Delta + \tilde{\pi})]}, \end{aligned}$$

where:

$$\begin{aligned} \xi_2^{OL} &\equiv \Delta - \frac{\pi^* - \frac{1}{2}}{\phi(1 - 2\lambda)} \equiv \Delta - \tilde{\pi} \\ \xi_B^{OL} &\equiv \Delta - \frac{\frac{\lambda}{1-2\lambda} - \frac{1}{2}}{\phi} \equiv \Delta - \tilde{\lambda} \\ \xi_A^{OL} &\equiv \Delta + \frac{\frac{\lambda}{1-2\lambda} - \frac{1}{2}}{\phi} \equiv \Delta + \tilde{\lambda} \\ \xi_1^{OL} &\equiv \Delta + \frac{\pi^* - \frac{1}{2}}{\phi(1 - 2\lambda)} \equiv \Delta + \tilde{\pi}. \end{aligned}$$

This implies that  $\Delta \in (0, \bar{\xi})$  (that  $\Delta \leq \bar{\xi}$  has to be true, because otherwise  $\Delta > \bar{\xi} \Rightarrow \Delta < 0$ ) and voters pay relatively more attention to the situation in which they are pivotal for the election of the lower-appeal candidate ( $q = 1$ ) of party  $A$  than the lower-appeal candidate of party  $B$ .

## References

Åsa von Schoultz and Matthew S. Shugart. 2018. “Modeling intraparty competition under OLPR: Contextualizing the personal vote.” unpublished.
